# Supplementary material
Source: MDPI journal article supplement (https://www.mdpi.com/2072-4292/14/23/6010)
Supplement: s1 [file s1]

Supplementary Materials:

Table S1. Phenology of major crops in HID.

| Month                | March  |           | April  |           | May       |            |           | June       |           |           | July           |            |            | August  |        |      | September  |        |      |
|----------------------|--------|-----------|--------|-----------|-----------|------------|-----------|------------|-----------|-----------|----------------|------------|------------|---------|--------|------|------------|--------|------|
| A Period of Ten Days | Last   | Early     | Middle | Last      | Early     | Middle     | Last      | Early      | Middle    | Last      | Early          | Middle     | Last       | Early   | Middle | Last | Early      | Middle | Last |
| Corn                 |        |           | Sowing |           | Emergence |            |           | Elongation |           | Tasseling | Flowering      | Silking    |            | Filling |        |      | Maturation |        |      |
| Spring Wheat         | Sowing | Emergence |        | Tillering |           | Elongation |           | Booting    | Heading   | Flowering | Filling        | Maturation |            |         |        |      |            |        |      |
| Sunflower            |        |           |        |           |           | Sowing     |           | Seedling   |           | Squaring  |                | Flowering  |            |         |        |      | Maturation |        |      |
| Cocozelle            |        |           |        |           | Sowing    |            | Emergence |            | Flowering |           | Fruit Swelling |            | Maturation |         |        |      |            |        |      |

**Table S2.** The accuracies of each dataset in the different time intervals during wet and dry season.

| Datasets                                      | Dry season |            | Wet season |            |
|-----------------------------------------------|------------|------------|------------|------------|
|                                               | Mar        | Mar to Apr | Aug        | Aug to Sep |
| Sentinel-1 PolSAR                             | 62.16      | 67.95      | 52.9       | 58.3       |
| Textures of Sentinel-2 red band               | 65.25      | 72.59      | 66.21      | 66.99      |
| Spectral bands of Sentinel-2                  | 69.11      | 88.22      | 68.73      | 70.46      |
| Indices built based on Sentinel-2             | 68.92      | 87.64      | 62.55      | 67.95      |
| Combined dataset of Sentinel-1 and Sentinel-2 | 74.32      | 89.96      | 71.81      | 72.39      |

**Table S3.** Classification accuracies of each variable and datasets for saline cropland mapping.

| Bands    | Overall accuracy | User accuracy |        | Producers accuracy |        | F1 Score   |        |
|----------|------------------|---------------|--------|--------------------|--------|------------|--------|
|          |                  | Non-saline    | Saline | Non-saline         | Saline | Non-saline | Saline |
| VV       | 0.5811           | 0.6530        | 0.4677 | 0.6592             | 0.4608 | 0.6561     | 0.4642 |
| VH       | 0.6622           | 0.7324        | 0.5662 | 0.6975             | 0.6078 | 0.7145     | 0.5863 |
| savg     | 0.6042           | 0.6799        | 0.4977 | 0.6561             | 0.5245 | 0.6677     | 0.5107 |
| idm      | 0.5463           | 0.6312        | 0.4286 | 0.6051             | 0.4559 | 0.6179     | 0.4418 |
| ent      | 0.5309           | 0.6263        | 0.4177 | 0.5605             | 0.4853 | 0.5916     | 0.4490 |
| dent     | 0.5367           | 0.6186        | 0.4126 | 0.6146             | 0.4167 | 0.6166     | 0.4146 |
| shade    | 0.4961           | 0.5892        | 0.3710 | 0.5573             | 0.4020 | 0.5728     | 0.3859 |
| asm      | 0.5386           | 0.6280        | 0.4222 | 0.5860             | 0.4657 | 0.6063     | 0.4429 |
| corr     | 0.5444           | 0.6242        | 0.4216 | 0.6242             | 0.4216 | 0.6242     | 0.4216 |
| dvar     | 0.5270           | 0.6194        | 0.4105 | 0.5701             | 0.4608 | 0.5937     | 0.4342 |
| diss     | 0.5039           | 0.5947        | 0.3779 | 0.5701             | 0.4020 | 0.5821     | 0.3895 |
| imcorr1  | 0.5270           | 0.6154        | 0.4064 | 0.5860             | 0.4363 | 0.6003     | 0.4208 |
| imcorr2  | 0.5212           | 0.6031        | 0.3889 | 0.6146             | 0.3775 | 0.6088     | 0.3831 |
| svar     | 0.5251           | 0.6083        | 0.3971 | 0.6083             | 0.3971 | 0.6083     | 0.3971 |
| contrast | 0.5232           | 0.6218        | 0.4115 | 0.5446             | 0.4902 | 0.5806     | 0.4474 |
| prom     | 0.5116           | 0.6109        | 0.3992 | 0.5350             | 0.4755 | 0.5705     | 0.4340 |
| var      | 0.4710           | 0.5735        | 0.3577 | 0.4968             | 0.4314 | 0.5324     | 0.3911 |
| inertia  | 0.5232           | 0.6218        | 0.4115 | 0.5446             | 0.4902 | 0.5806     | 0.4474 |
| sent     | 0.5212           | 0.6154        | 0.4052 | 0.5605             | 0.4608 | 0.5867     | 0.4312 |
| B2       | 0.6911           | 0.7601        | 0.5991 | 0.7166             | 0.6520 | 0.7377     | 0.6244 |
| B3       | 0.7876           | 0.8312        | 0.7238 | 0.8153             | 0.7451 | 0.8232     | 0.7343 |
| B4       | 0.7703           | 0.8197        | 0.6995 | 0.7962             | 0.7304 | 0.8078     | 0.7146 |
| B5       | 0.7297           | 0.8042        | 0.6379 | 0.7325             | 0.7255 | 0.7667     | 0.6789 |
| B6       | 0.6969           | 0.7735        | 0.6017 | 0.7070             | 0.6814 | 0.7388     | 0.6391 |
| B7       | 0.6795           | 0.7721        | 0.5772 | 0.6688             | 0.6961 | 0.7167     | 0.6311 |
| B8       | 0.6776           | 0.7673        | 0.5761 | 0.6720             | 0.6863 | 0.7165     | 0.6264 |
| B8A      | 0.6448           | 0.7355        | 0.5413 | 0.6465             | 0.6422 | 0.6881     | 0.5874 |
| B11      | 0.5753           | 0.6516        | 0.4615 | 0.6433             | 0.4706 | 0.6474     | 0.4660 |
| B12      | 0.6506           | 0.7166        | 0.5545 | 0.7006             | 0.5735 | 0.7085     | 0.5639 |
| NDVI     | 0.7085           | 0.7820        | 0.6157 | 0.7197             | 0.6912 | 0.7496     | 0.6513 |

---

|                |        |        |        |        |        |        |        |
|----------------|--------|--------|--------|--------|--------|--------|--------|
| SAVI           | 0.7085 | 0.7820 | 0.6157 | 0.7197 | 0.6912 | 0.7496 | 0.6513 |
| OSAVI          | 0.7066 | 0.7893 | 0.6092 | 0.7038 | 0.7108 | 0.7441 | 0.6561 |
| MSAVI          | 0.7162 | 0.7869 | 0.6256 | 0.7293 | 0.6961 | 0.7570 | 0.6589 |
| SI             | 0.7896 | 0.8317 | 0.7273 | 0.8185 | 0.7451 | 0.8250 | 0.7361 |
| NDSI           | 0.7027 | 0.7817 | 0.6068 | 0.7070 | 0.6961 | 0.7425 | 0.6484 |
| DVI            | 0.7046 | 0.7639 | 0.6197 | 0.7420 | 0.6471 | 0.7528 | 0.6331 |
| Sentinel-1     | 0.6853 | 0.7559 | 0.5919 | 0.7102 | 0.6471 | 0.7323 | 0.6183 |
| Sentinel-2     | 0.8900 | 0.9241 | 0.8419 | 0.8917 | 0.8873 | 0.9076 | 0.8640 |
| S1_S2 combined | 0.8996 | 0.9309 | 0.8551 | 0.9013 | 0.8971 | 0.9159 | 0.8756 |

---
